# Supplementary material
Source: PubMed Central journal article supplement (PMC5889140)
Supplement: NIHMS954252-supplement-supplement_1.pdf [file NIHMS954252-supplement-supplement_1.pdf]

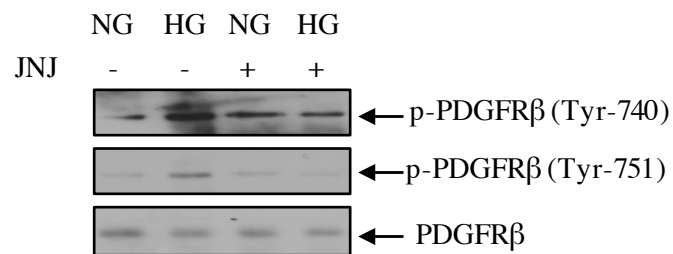

**Supplementary Fig. S1.** The PDGFR $\beta$  inhibitor JNJ blocks tyrosine phosphorylation of PDGFR $\beta$  at residues 740 and 751. Mesangial cells were treated with 0.1  $\mu$ M JNJ prior to incubation with normal glucose (NG) or high glucose (HG) for 24 hours. The cell lysates were immunoblotted with phospho-PDGFR $\beta$  (Tyr-740), phospho-PDGFR $\beta$  (Tyr-751) and PDGFR $\beta$  antibodies as indicated.

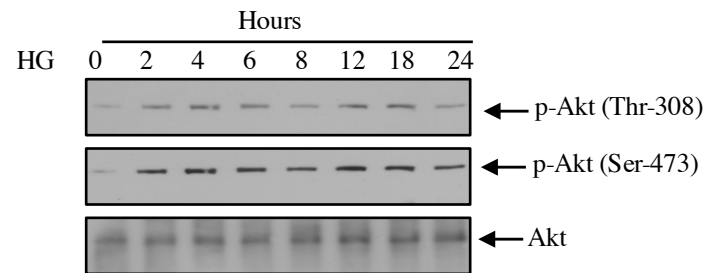

**Supplementary Fig. S2.** High glucose increases the phosphorylation of Akt in a time-dependent manner. Serum-starved mesangial cells were incubated with 25 mM glucose (HG) for indicated periods of time. The cell lysates were immunoblotted with phospho-Akt (Thr-308), phospho-Akt (Ser-473) and Akt antibodies.

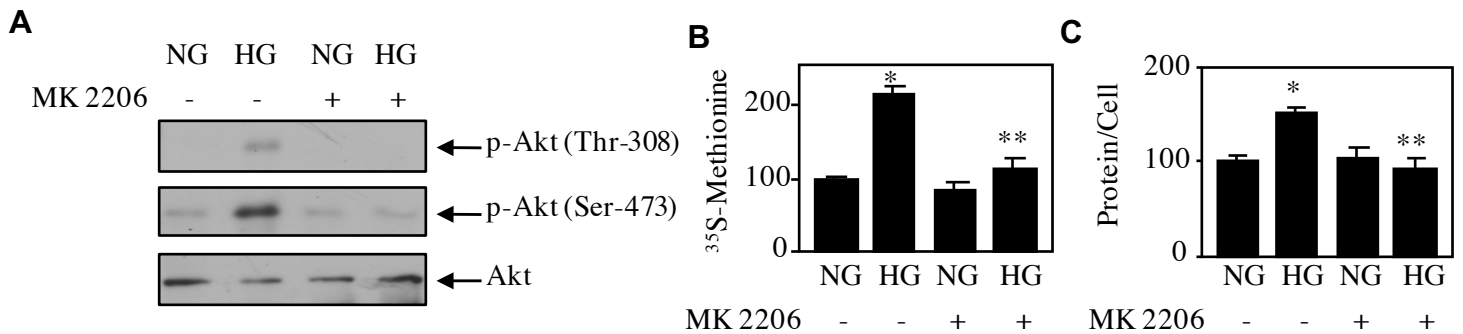

**Supplementary Fig. S3.** Akt inhibitor MK 2206 blocks Akt phosphorylation and high glucose-induced mesangial cell protein synthesis and hypertrophy. Serum-starved mesangial cells were treated with 0.1  $\mu$ M MK 2206 (MK) for one hour prior to incubation with normal glucose (NG) or high glucose (HG). (A) The cell lysates were immunoblotted with phospho-Akt (Thr-308), phospho-Akt (Ser-473) and Akt antibodies. (B and C) Protein synthesis as the incorporation of  $^{35}$ S-Methionine (panel B) and hypertrophy as the ratio of protein to cell number (panel C) were determined. Mean  $\pm$  SE of 3 – 6 measurements is shown. \* $p < 0.01$  vs NG; \*\* $p < 0.01$  vs HG.

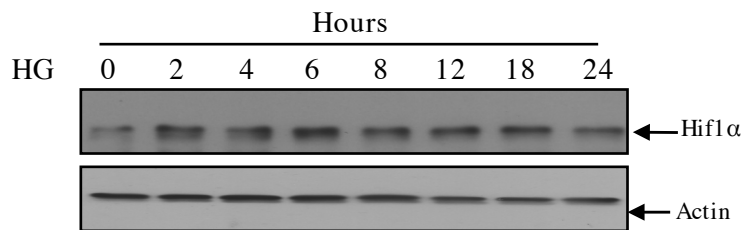

**Supplementary Fig. S4.** High glucose increases the expression of Hif1 $\alpha$  in a time-dependent manner. Serum-starved mesangial cells were incubated with 25 mM glucose (HG) for indicated periods of time. The cell lysates were immunoblotted with Hif1 $\alpha$  and actin antibodies.
